# Supplementary figures and images for: Mg2+-dependent conformational equilibria in CorA and an integrated view on transport regulation
Source: eLife journal article supplement (doi:10.7554/elife.71887), 2022-02-07

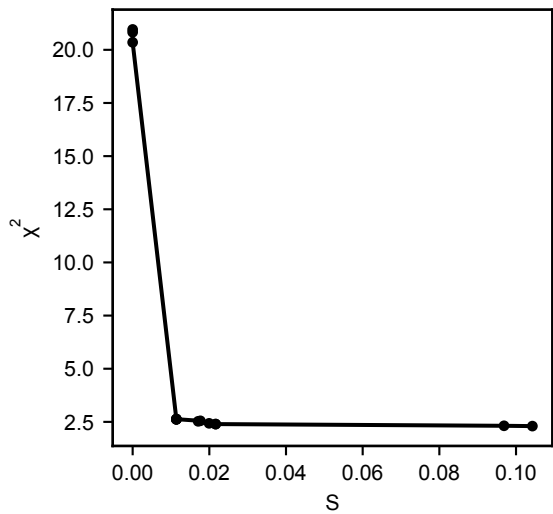

Supplement: supp [file elife-71887-supp-v1.zip]

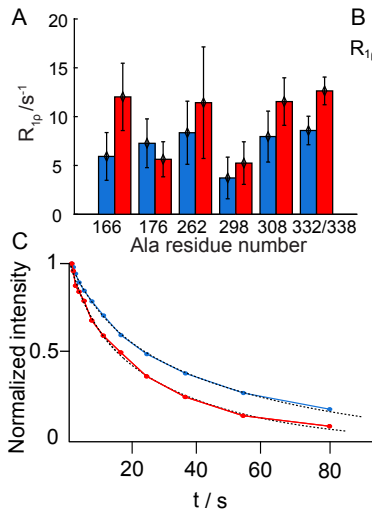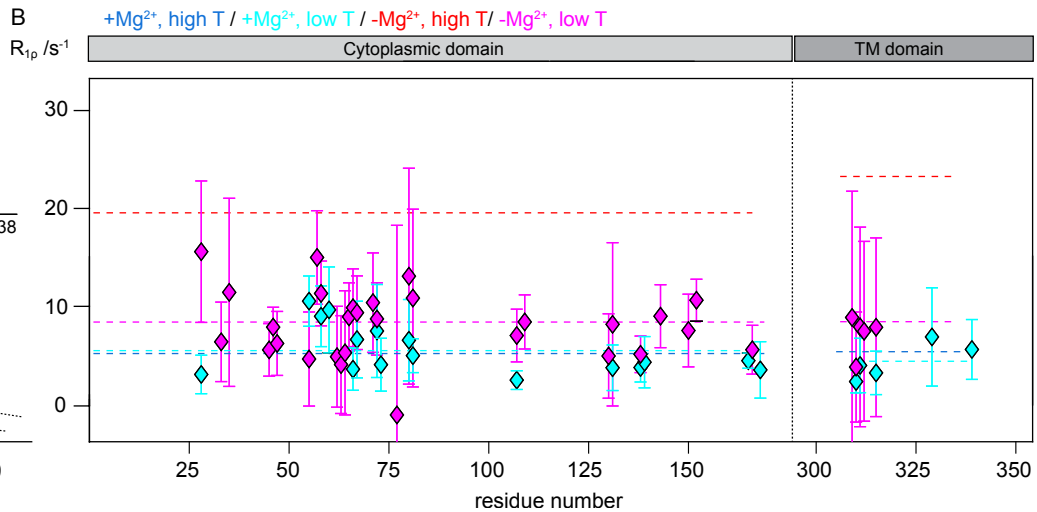

Supplement: supp [file elife-71887-supp-v1.zip]

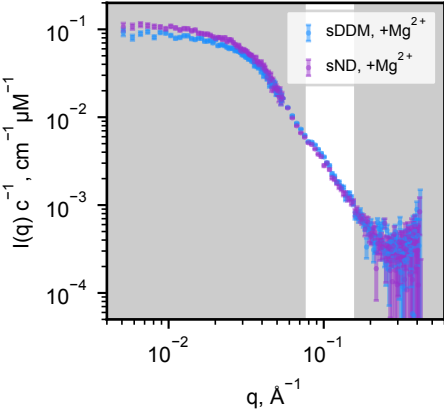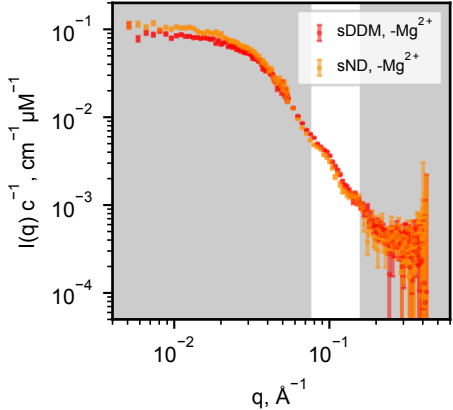

Supplement: supp [file elife-71887-supp-v1.zip]

# Normal Mode Analysis structures

# MetaD clusters

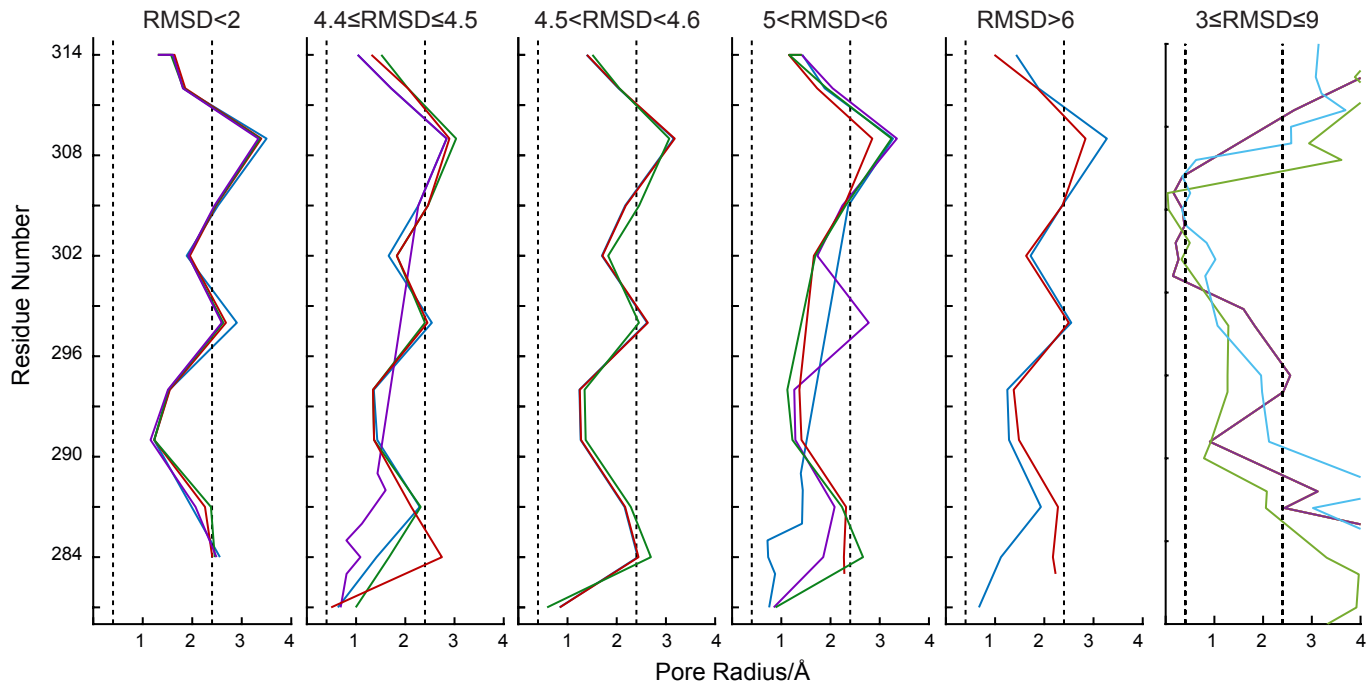

Supplement: supp [file elife-71887-supp-v1.zip]

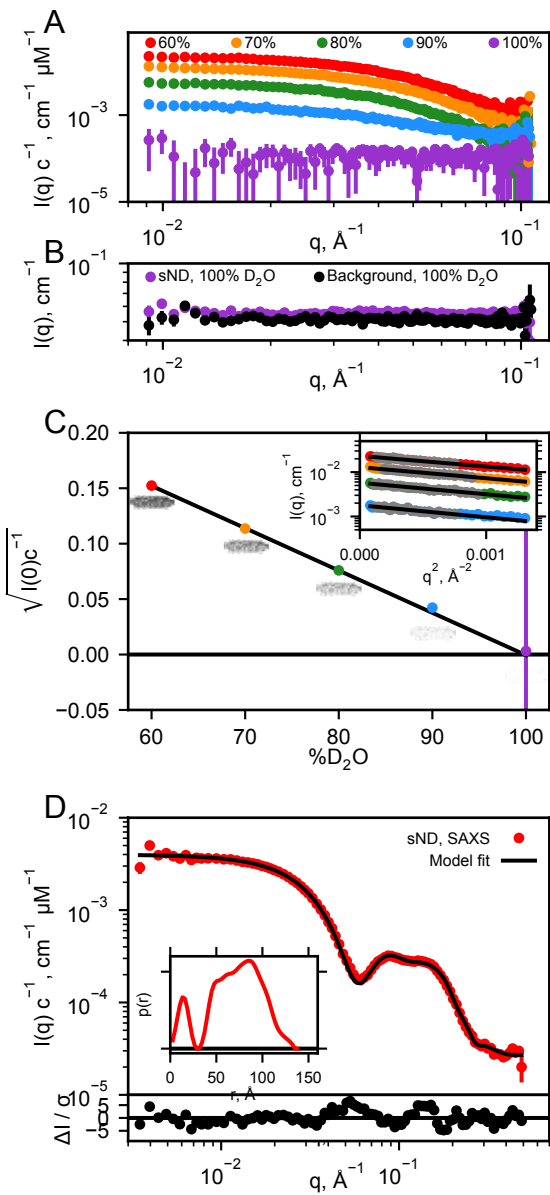

Supplement: supp [file elife-71887-supp-v1.zip]

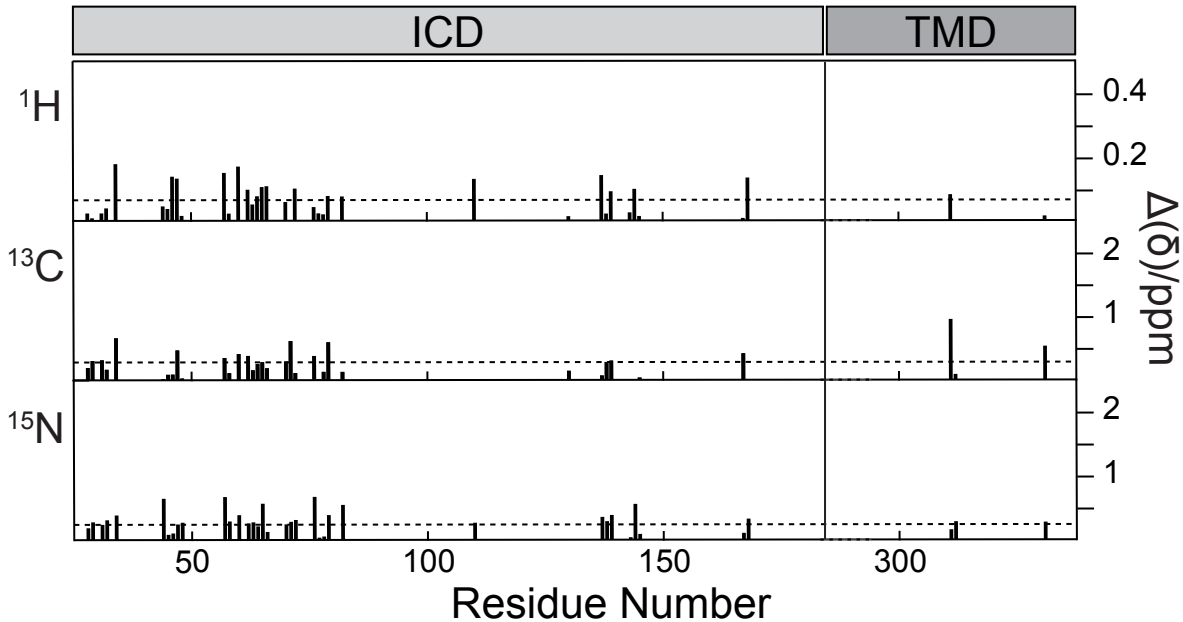

Supplement: supp [file elife-71887-supp-v1.zip]

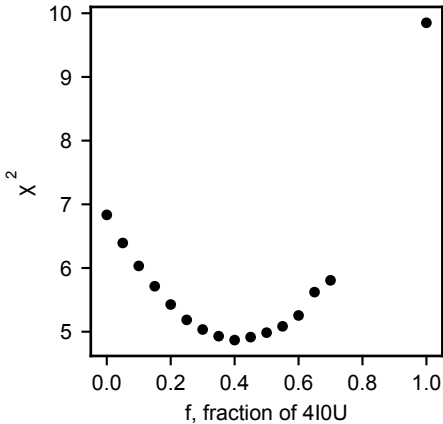

Supplement: supp [file elife-71887-supp-v1.zip]

A

No symmetry (P1) imposed

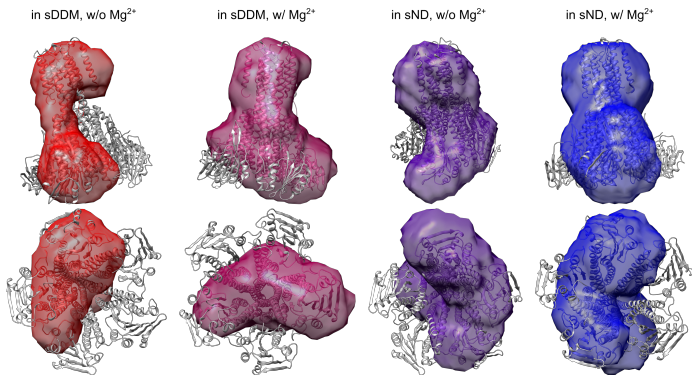

B

P5 symmetry imposed

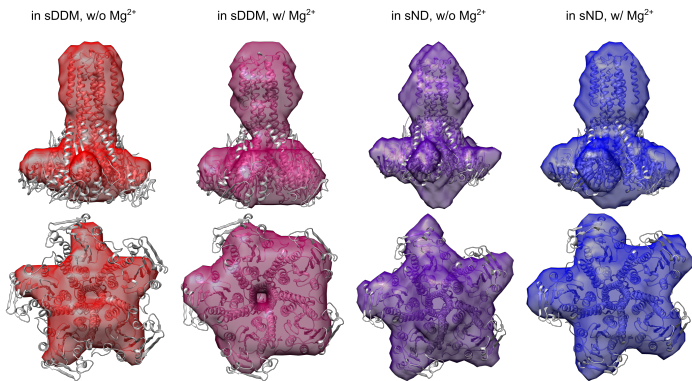

Supplement: supp [file elife-71887-supp-v1.zip]
